# Supplementary material
Source: PubMed Central journal article supplement (PMC5832926)

A

Volcano Plot: Day 1/Day 2 ratio

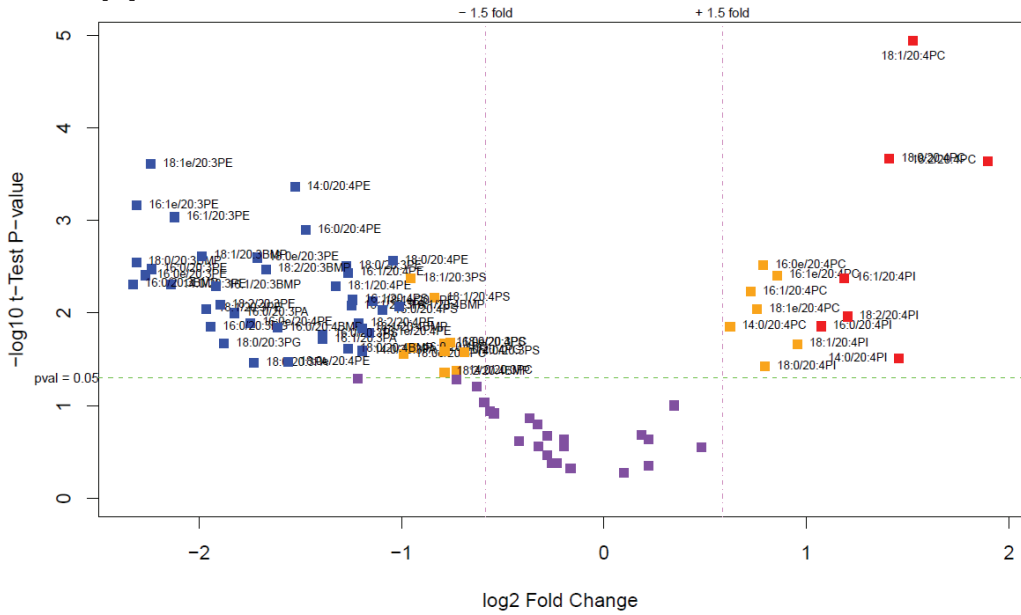

B

Volcano Plot: Day 2/Day 3 ratio

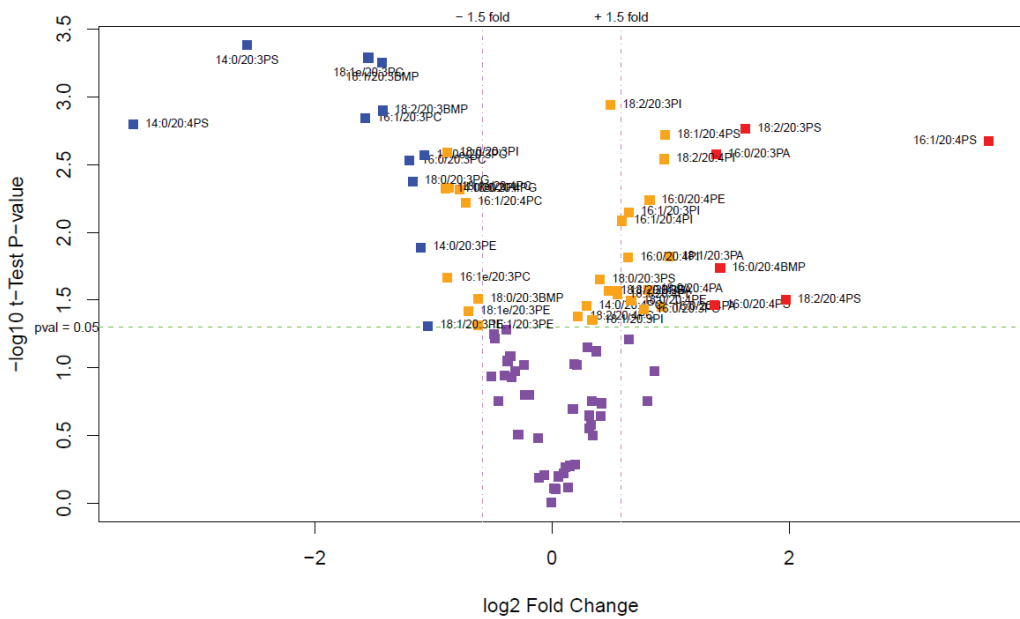

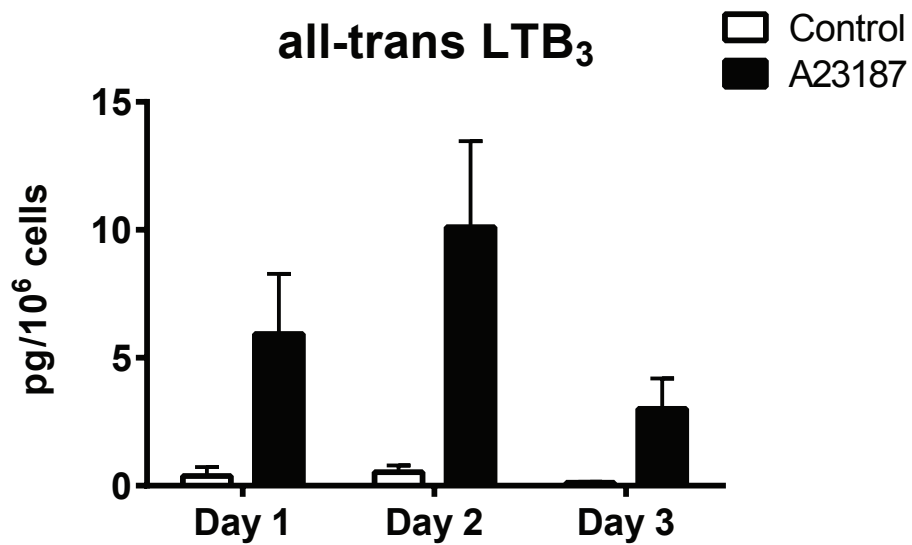

Figure S2

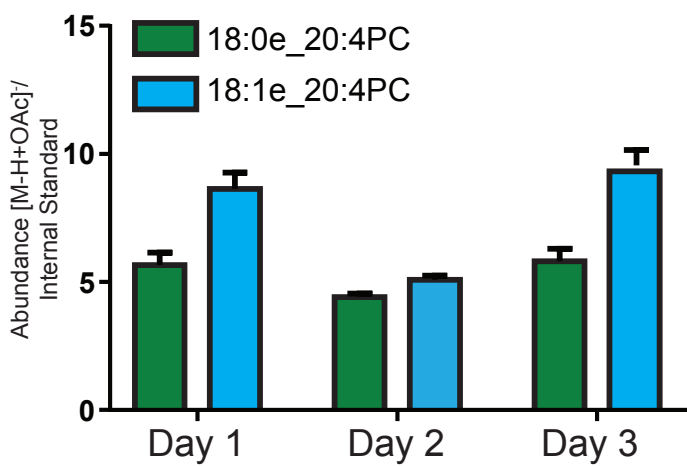

Supplemental Figure S3

Supplement: supp_M083030_Supplemental_Figures.pdf [file supp_M083030_Supplemental_Figures.pdf]
